# Supplementary material for: Glycosylceramide modifies the flavor and metabolic characteristics of sake yeast
Source: PeerJ. 2018 May 10;6:e4768. doi: 10.7717/peerj.4768 (PMC5949206; doi:10.7717/peerj.4768)
Supplement: Supplemental Information 2 — Data of all flavor and metabolic profiles of sake yeast or media fermented with sake yeast. [file peerj-06-4768-s002.xlsx]

## Sheet: Ethanol
Supplemntary Table S1. Flavor components of the fermented culture added with ethanol.
PeakNo	Name	Hit%	RT	Peak-RI	m/z	Y151208-1	Y151208-2	Y151208-3
#1	Butanoic acid, ethyl ester	93	8.917	1026	71	3142134	2534495	4465213
#2	1-Propanol, 2-methyl-	91	10.944	1104	43	14163570	18212838	14076527
#3	1-Butanol, 3-methyl-, acetate	90	11.527	1118	43	11257618	6521157	19237989
#4	1-Butanol, 3-methyl-	78	15.041	1201	55	53649802	57617358	62571985
#5	Hexanoic acid, ethyl ester	96	16.055	1222	88	45494497	25076803	68943277
#6	2-Butanone, 3-hydroxy-	86	17.863	1260	45	13196013	14290041	12576867
#7	Octanoic acid, ethyl ester	91	24.87	1417	88	265604354	172630194	307723922
#8	Decanoic acid, ethyl ester	95	33.233	1623	88	194402984	92516797	189841477
#9	Ethyl 9-decenoate	90	35.033	1669	88	26769208	19100901	45257386
#10	Acetic acid, 2-phenylethyl ester	83	38.963	1774	104	2847142	2024792	4586798
#11	Hexnoic acid	83	39.96	1802	60	2698518	2891309	5529933
#12	Dodecanoic acid, ethyl ester	98	40.772	1825	88	34548595	20043524	27274702
#13	Phenylethyl Alcohol	94	42.186	1865	91	16278880	17269807	18913914
#14	Ethyl tridecanoate	95	44.315	1927	88	731046	1030497	1383159
#15	Octanoic Acid	90	47.202	2015	60	13767891	14408274	21897033
#16	n-Decanoic acid	98	53.793	2225	73	10321297	6955230	14660960
#17	Ethyl 9-hexadecenoate	97	54.763	2258	55	416943	309413	1915900
#18	Dodecanoic acid	99	59.852	2435	60	3723349	2285711	5549634

## Sheet: G. frondosa
Supplemntary Table S2. Flavor components of the fermented culture added with glycosylceramide derived from G. frondosa.
PeakNo	Name	Hit%	RT	Peak-RI	m/z	B151208-1	B151208-2	B151208-3
#1	Butanoic acid, ethyl ester	93	8.917	1026	71	4123706	4231179	2838709
#2	1-Propanol, 2-methyl-	91	10.944	1104	43	16240838	18458931	11351217
#3	1-Butanol, 3-methyl-, acetate	90	11.527	1118	43	13783624	17791467	11478577
#4	1-Butanol, 3-methyl-	78	15.041	1201	55	57161247	64634375	49389455
#5	Hexanoic acid, ethyl ester	96	16.055	1222	88	39324406	38633246	30398737
#6	2-Butanone, 3-hydroxy-	86	17.863	1260	45	13199235	14783328	9964197
#7	Octanoic acid, ethyl ester	91	24.87	1417	88	126778209	130237477	119163624
#8	Decanoic acid, ethyl ester	95	33.233	1623	88	99479627	104591564	61948498
#9	Ethyl 9-decenoate	90	35.033	1669	88	9278511	8289961	6301833
#10	Acetic acid, 2-phenylethyl ester	83	38.963	1774	104	12214411	12858830	15696194
#11	Hexnoic acid	83	39.96	1802	60	4233460	5166239	3565302
#12	Dodecanoic acid, ethyl ester	98	40.772	1825	88	18381910	17911722	9582007
#13	Phenylethyl Alcohol	94	42.186	1865	91	33687263	39431895	40160225
#14	Ethyl tridecanoate	95	44.315	1927	88	2550709	1229381	1942750
#15	Octanoic Acid	90	47.202	2015	60	17768571	23774059	16942949
#16	n-Decanoic acid	98	53.793	2225	73	7727311	12277458	6571299
#17	Ethyl 9-hexadecenoate	97	54.763	2258	55	872098	338324	451186
#18	Dodecanoic acid	99	59.852	2435	60	2219215	3737279	2174168

## Sheet: A. oryzae
Supplemntary Table S3. Flavor components of the fermented culture added with glycosylceramide derived from A. oryzae.
PeakNo	Name	Hit%	RT	Peak-RI	m/z	O151208-1	O151208-2	O151208-3
#1	Butanoic acid, ethyl ester	93	8.917	1026	71	5354017	2630607	4131338
#2	1-Propanol, 2-methyl-	91	10.944	1104	43	16625391	13893978	12639954
#3	1-Butanol, 3-methyl-, acetate	90	11.527	1118	43	25471433	8730236	17727263
#4	1-Butanol, 3-methyl-	78	15.041	1201	55	58668178	49086911	52121639
#5	Hexanoic acid, ethyl ester	96	16.055	1222	88	52431267	26785397	54568826
#6	2-Butanone, 3-hydroxy-	86	17.863	1260	45	9829518	12988332	8415108
#7	Octanoic acid, ethyl ester	91	24.87	1417	88	149436406	130620662	140419004
#8	Decanoic acid, ethyl ester	95	33.233	1623	88	107864481	52824083	123382624
#9	Ethyl 9-decenoate	90	35.033	1669	88	9900257	9351986	15733878
#10	Acetic acid, 2-phenylethyl ester	83	38.963	1774	104	12627622	12134644	8396841
#11	Hexnoic acid	83	39.96	1802	60	6764847	3092441	4807048
#12	Dodecanoic acid, ethyl ester	98	40.772	1825	88	26322795	7588978	56521684
#13	Phenylethyl Alcohol	94	42.186	1865	91	27784717	35083720	20792653
#14	Ethyl tridecanoate	95	44.315	1927	88	1776459	1536106	4935101
#15	Octanoic Acid	90	47.202	2015	60	30828294	14034843	23657665
#16	n-Decanoic acid	98	53.793	2225	73	15621479	5259630	15752840
#17	Ethyl 9-hexadecenoate	97	54.763	2258	55	474717	385088	1800078
#18	Dodecanoic acid	99	59.852	2435	60	4709929	1698872	5331130

## Sheet: Ethanol2
Supplementary Table S4. Flavor components of the fermented culture added with ethanol.
PeakNo	Name	Hit%	RT	Peak-RI	m/z	B151210-1	B151210-2	B151210-3
#1	Butanoic acid, ethyl ester	93	8.917	1026	71	4352580	4507575	6699874
#2	1-Propanol, 2-methyl-	91	10.944	1104	43	12486710	15073182	14931138
#3	1-Butanol, 3-methyl-, acetate	90	11.527	1118	43	21156341	19954386	32189242
#4	1-Butanol, 3-methyl-	78	15.041	1201	55	58416773	66127327	69566337
#5	Hexanoic acid, ethyl ester	96	16.055	1222	88	64252007	56191077	97144541
#6	2-Butanone, 3-hydroxy-	86	17.863	1260	45	9173646	10501726	7605941
#7	Octanoic acid, ethyl ester	91	24.87	1417	88	237900385	205143160	395525122
#8	Decanoic acid, ethyl ester	95	33.233	1623	88	113224556	110334593	240023126
#9	Ethyl 9-decenoate	90	35.033	1669	88	40047417	39507833	63282227
#10	Acetic acid, 2-phenylethyl ester	83	38.963	1774	104	4564505	4433313	7027920
#11	Hexnoic acid	83	39.96	1802	60	3667564	5144220	6329120
#12	Dodecanoic acid, ethyl ester	98	40.772	1825	88	25490231	26942622	32050533
#13	Phenylethyl Alcohol	94	42.186	1865	91	14765527	17839215	17880531
#14	Ethyl tridecanoate	95	44.315	1927	88	1465354	2013916	717274
#15	Octanoic Acid	90	47.202	2015	60	18192130	24431591	26232696
#16	n-Decanoic acid	98	53.793	2225	73	8446992	12466312	16923703
#17	Ethyl 9-hexadecenoate	97	54.763	2258	55	1105875	1161380	2359047
#18	Dodecanoic acid	99	59.852	2435	60	3051701	3962048	6264416

## Sheet: Soy
Supplemntary Table S5. Flavor components of the fermented culture added with glycosylceramide derived from soy.
PeakNo	Name	Hit%	RT	Peak-RI	m/z	O151210-1	O151210-2	O151210-3
#1	Butanoic acid, ethyl ester	93	8.917	1026	71	4144327	4353989	4814084
#2	1-Propanol, 2-methyl-	91	10.944	1104	43	14261100	13913295	15937394
#3	1-Butanol, 3-methyl-, acetate	90	11.527	1118	43	25974099	19940990	22400351
#4	1-Butanol, 3-methyl-	78	15.041	1201	55	61821159	61470298	66212889
#5	Hexanoic acid, ethyl ester	96	16.055	1222	88	63962270	56324219	62728085
#6	2-Butanone, 3-hydroxy-	86	17.863	1260	45	5873300	8145092	9095548
#7	Octanoic acid, ethyl ester	91	24.87	1417	88	304246266	291346869	303717569
#8	Decanoic acid, ethyl ester	95	33.233	1623	88	174394635	219578740	201706201
#9	Ethyl 9-decenoate	90	35.033	1669	88	25814498	29749506	32290614
#10	Acetic acid, 2-phenylethyl ester	83	38.963	1774	104	11444722	7803239	11579484
#11	Hexnoic acid	83	39.96	1802	60	2564949	3246274	4864570
#12	Dodecanoic acid, ethyl ester	98	40.772	1825	88	24447658	33396783	26000016
#13	Phenylethyl Alcohol	94	42.186	1865	91	20970157	22938441	28271444
#14	Ethyl tridecanoate	95	44.315	1927	88	826703	1089775	898032
#15	Octanoic Acid	90	47.202	2015	60	15163474	15918362	20232173
#16	n-Decanoic acid	98	53.793	2225	73	11711108	11701993	13613332
#17	Ethyl 9-hexadecenoate	97	54.763	2258	55	1017299	807460	1063031
#18	Dodecanoic acid	99	59.852	2435	60	859009	4833308	5895233

## Sheet: A. oryzae2
Supplemntary Table S6. Flavor components of the fermented culture added with glycosylceramide derived from A. oryzae.
PeakNo	Name	Hit%	RT	Peak-RI	m/z	Y151210-1	Y151210-2	Y151210-3
#1	Butanoic acid, ethyl ester	93	8.917	1026	71	5541375	3052388	1867836
#2	1-Propanol, 2-methyl-	91	10.944	1104	43	13865403	11295805	11288843
#3	1-Butanol, 3-methyl-, acetate	90	11.527	1118	43	26943710	15590721	6423568
#4	1-Butanol, 3-methyl-	78	15.041	1201	55	56789631	45108782	43922572
#5	Hexanoic acid, ethyl ester	96	16.055	1222	88	50866544	37282637	20921180
#6	2-Butanone, 3-hydroxy-	86	17.863	1260	45	3370059	2951528	5881619
#7	Octanoic acid, ethyl ester	91	24.87	1417	88	205192652	127731139	124238753
#8	Decanoic acid, ethyl ester	95	33.233	1623	88	179225168	113287435	29110417
#9	Ethyl 9-decenoate	90	35.033	1669	88	18855223	14576868	16859125
#10	Acetic acid, 2-phenylethyl ester	83	38.963	1774	104	6595088	3971415	9471704
#11	Hexnoic acid	83	39.96	1802	60	5639885	2934496	1818634
#12	Dodecanoic acid, ethyl ester	98	40.772	1825	88	32340144	23815201	8388299
#13	Phenylethyl Alcohol	94	42.186	1865	91	14705915	10430755	20404035
#14	Ethyl tridecanoate	95	44.315	1927	88	1071109	827428	2323741
#15	Octanoic Acid	90	47.202	2015	60	28264435	16262834	9921362
#16	n-Decanoic acid	98	53.793	2225	73	28967844	16613799	2063809
#17	Ethyl 9-hexadecenoate	97	54.763	2258	55	1671693	767373	296803
#18	Dodecanoic acid	99	59.852	2435	60	9772760	4996337	822694

## Sheet: Extracellularraw
Supplementary Table S7. Extracellular metabolite concentrations of sake yeast added with or without glycosylceramide.
	Valine	Alanine	Glycerol	Succinate(Glycine)	Fumarate/Uracil	Aspartate	Malate	Ribitol	Citrate	Proline/Isoleucin	Threonine/Isoleucine/Proline	Glutamate	Phenylalanine	Galactose	Glucose	Serine	Leucine	Valine2	Urea	Lysine	Methionine	Serine/Alanine	Glucose2	Glucose3	Maltose	Inositol	Pyruvate	Threonine2	Fructose	Asparagine
CONT_1_001.gcd	46522	17922	2933169	138205	0	63434	41044	687395	26702	58408	47512	1191771	45616	329129	40104049	55541	73369	21712	10973	617330	4981	1872	8665981	0	1469755	13696	13416	5957	281179	60166
CONT_2_005.gcd	45881	95992	3387494	171868	0	72156	49156	748178	26456	62781	56540	1272944	52010	360592	37892737	135182	72782	30570	11407	520913	7119	4495	8347157	365755	1676198	26279	26313	9903	360592	65282
CONT_3_009.gcd	52754	31579	3612470	177864	0	87295	47473	832219	36680	71871	62352	1426471	73000	340097	42600327	64578	85815	36276	10491	445727	8023	9513	9553644	0	1856504	43461	14734	10926	254481	71382
CONT_5_003.gcd	59863	25867	3807315	172509	0	80709	46457	845760	28261	68233	58286	1451433	66568	419778	42005711	63130	85523	31535	10759	645583	8092	4417	9256027	0	1862938	21482	13750	10826	419778	74235
CONT_6_007.gcd	43912	34082	4167829	217769	0	42262	50875	796900	31960	64941	37807	1406729	55928	391830	26720917	32660	65825	36396	11975	458600	11550	92244	6640327	100812	1780127	19419	33924	22596	376457	76741
CONT_7_002.gcd	54024	34294	3659649	176134	0	95701	47863	849296	50001	68311	68895	1444691	87662	342685	44635907	65820	83053	39283	10478	347469	7412	11522	9956231	0	1907127	53115	13984	11459	342685	72824
CONT_8_006.gcd	31341	29048	3470253	181023	0	82486	45997	746635	45161	63495	62583	1298868	64636	225092	32370699	50200	67250	41884	10938	277044	8431	11498	7804830	0	1653444	41482	18854	12820	225092	65668
SOY_1_004.gcd	85895	91983	4019612	191597	0	82259	52822	829479	36242	71342	65075	1436728	69354	358648	34162954	74110	79827	40580	11088	511451	9546	3711	7966873	0	1848904	18895	35964	15010	358648	73850
SOY_2_008.gcd	42213	39464	4070156	222069	0	74578	52978	808902	37486	66623	57300	1418029	63079	346134	27865871	40939	69732	43405	11382	432653	11515	5777	6950731	0	1820916	20780	78410	18569	346134	73681
SOY_3_003.gcd	54367	48141	4291779	216853	0	96810	66459	891997	54399	75754	75220	1550686	92505	273175	35689479	60612	81754	51948	11355	316257	9515	13587	8425314	0	2010070	41251	34270	15368	273175	79184
SOY_4_007.gcd	41969	51998	4695383	250741	0	93401	59878	882594	59207	68642	83508	1557548	90671	239176	24284289	32847	69609	55771	11216	255362	13629	13820	6358203	0	1959486	28292	61581	25642	239176	79972
SOY_5_002.gcd	26677	28811	4209258	213134	0	72243	65151	836395	34660	69331	62029	1432295	65153	422757	29705532	51204	73298	39874	12462	569429	8979	2607	7073352	0	1846473	11407	31574	14859	422757	75701
SOY_6_006.gcd	42537	36273	3968495	201029	0	82696	62935	792780	37169	67092	55884	1392667	62799	362465	28215319	93692	70568	39723	10610	456524	9120	4698	6848165	204619	1766776	17841	52095	16953	362465	71334
SOY_7_001.gcd	39894	45570	4182583	224858	0	90263	52438	819057	48991	66581	76377	1433764	74009	340997	25869537	49955	69507	50984	11562	331409	11207	8389	6577967	266756	1831221	22777	31442	21591	340997	73587
SOY_8_005.gcd	41487	51516	4308612	231233	0	90604	55899	851610	56615	68422	75645	1485800	80966	316779	27281147	51250	69713	49045	11288	274125	12205	13289	6948934	0	1867359	29889	40434	21757	316779	75186
