# Supplementary material for: Glycosylceramide modifies the flavor and metabolic characteristics of sake yeast
Source: PeerJ journal article supplement (doi:10.7717/peerj.4768), 2018-05-10
Supplement: supplementaryFig1.pdf [file supplementaryFig1.pdf]

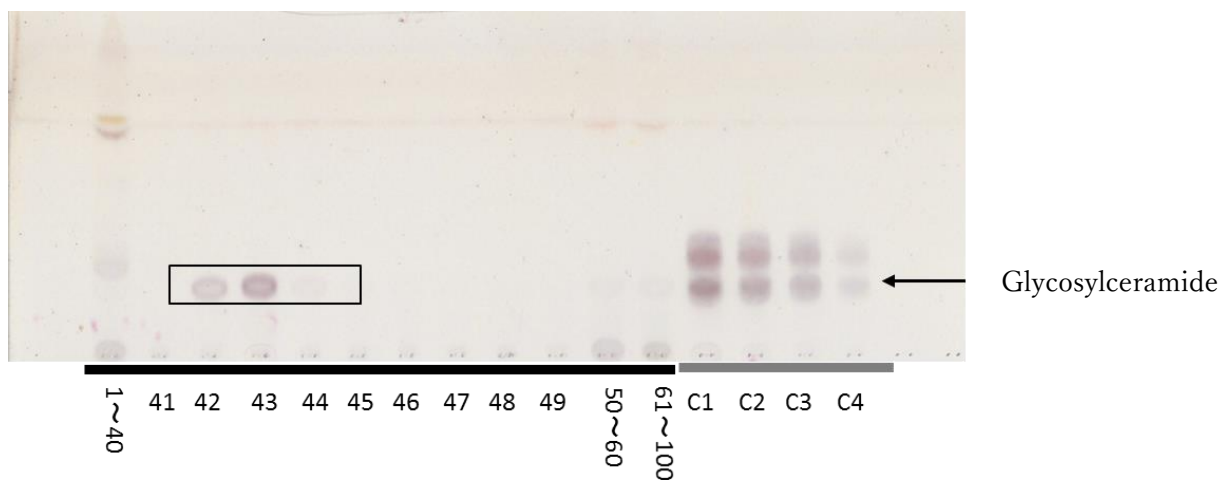

Fig. S1. Purification of glycosylceramide from mycelia of *A. oryzae*.

Total lipids were extracted from a 500 ml culture of *A. oryzae*, and purified using silicagel column chromatography and HPLC. Detailed methods are described in the text. Numbers indicate the fraction numbers. C1–C4 indicates standard cerebroside obtained from Matreya Inc. (C1: 23.1  $\mu\text{g}$ , C2: 11.6  $\mu\text{g}$ , C3: 5.8  $\mu\text{g}$ , C4: 2.9  $\mu\text{g}$ ).
